# 1 **Directed yeast genome evolution by controlled introduction of trans-** 2 **chromosomal structural variations**

3 Bin Jia<sup>1,2,\*</sup>, Jin Jin<sup>1,2,\*</sup>, Ming-Zhe Han<sup>1,2</sup>, Bing-Zhi Li<sup>1,2</sup> & Ying-Jin Yuan<sup>1,2,†</sup>

4  
5 <sup>1</sup> Frontier Science Center for Synthetic Biology and Key Laboratory of Systems  
6 Bioengineering (Ministry of Education), School of Chemical Engineering and  
7 Technology, Tianjin University, 300072 Tianjin, China.

8 <sup>2</sup> Collaborative Innovation Center of Chemical Science and Engineering (Tianjin),  
9 Tianjin University, 300072 Tianjin, China.

10 \* Authors contributed equally to this work.

11 † Corresponding author (email: [yjyuan@tju.edu.cn](mailto:yjyuan@tju.edu.cn))

## 12 13 **ABSTRACT**

14 Naturally occurring structural variations (SVs) are a considerable source of genomic  
15 variation and can reshape chromosomes 3D architecture. The synthetic chromosome  
16 rearrangement and modification by loxP-mediated evolution (SCRaMbLE) system has  
17 been proved to generate random SVs to impact phenotypes and thus constitutes  
18 powerful drivers of directed genome evolution. However, how to reveal the molecular  
19 mechanism insights into the interactions between phenotypes and complex SVs,  
20 especially inversions and translocations, has so far remained challenging. In this study,  
21 we develop a SV-prone yeast strain by using SCRaMbLE with two synthetic  
22 chromosomes, synV and synX. An heterologous biosynthesis pathway allowing a high

23 throughput screen for increased yield of astaxanthin is used as readout and a proof of  
24 concept for the application of SV in industry. We report here that complex SVs,  
25 including a pericentric inversion and a trans-chromosomes translocation between synV  
26 and synX, result in two neochromosomes and a 2.7-fold yield of astaxanthin. We  
27 demonstrated that inversion and inversion reshaped chromosomes 3D architecture and  
28 led to large reorganization of the genetic information nearby the breakpoint of the SVs  
29 along the chromosomes. Specifically, the pericentric inversion increased the expression  
30 of STE18 and the trans-chromosomal translocation increased the expression of RPS5  
31 and MCM22, which contributed to higher astaxanthin yield. We also used the model  
32 learned from the aforementioned random screen and successfully harnessed the precise  
33 introduction of trans-chromosomes translocation and pericentric inversions by rational  
34 design. Overall, our work provides an effective tool to not only accelerate the directed  
35 genome evolution but also reveal mechanistic insight of complex SVs for altering  
36 phenotypes.

37

38 **Key words:** Directed genome evolution, Structural variations, SCRaMbLE, Pericentric  
39 inversion, Trans-chromosomes translocation

40

## 41 **Introduction**

42 Chromosomes are highly dynamic objects that often undergo large structural  
43 variations(SVs), which in turn can reshape chromosomes and impact  
44 phenotypes(Pevzner and Tesler 2003; Dujon et al. 2004; Redon et al. 2006; Darling et

45 al. 2008; Kidd et al. 2008; Conrad et al. 2010; Dujon 2010; Pang et al. 2010; Hensen  
46 et al. 2017; Yue et al. 2017; Peter et al. 2018). Naturally occurring SVs comprised both  
47 unbalanced SVs that are copy number variations including deletions and duplications,  
48 and balanced SVs that are copy number neutral including inversions and  
49 translocations(Fleiss et al. 2019). Both the unbalanced SVs and balanced SVs can  
50 modify the 3D architecture of the chromosomes and potentially affect genetic  
51 functioning, which contributed to the genome evolution. For example, Selmecki.et al  
52 showed tetraploids yeast undergo significantly faster adaptation in a poor carbon source  
53 environment with larger deletion of chromosomes. (Selmecki et al. 2015). Li.et al found  
54 that deletion of left arm of synthetic chromosome X and duplication of chromosome  
55 VIII (trisomy) lead to increased rapamycin resistance in yeast(Li et al. 2019). With the  
56 development of genome medicine, it is indicated reciprocal translocation between  
57 chromosomes have contributed to several human diseases, for instance, chronic  
58 myeloid leukemia (chromosomes 9 with 22) and Mobius-like syndrome (chromosomes  
59 1 with 2)(Eyupoglu et al. 2016) (Nishikawa et al. 1997). In addition, pericentric  
60 inversion of chromosome 9 is one of the most common chromosomal abnormalities and  
61 can be associated with ambiguous genitalia in children(Sotoudeh et al. 2017). It is  
62 challenge to map the balanced SVs than unbalanced SVs due to the copy number neutral.  
63 So far, the detailed molecular mechanism underlying balanced SVs remained  
64 unexplored due to lack of cell models.

65 The baker yeast (*Saccharomyces cerevisiae*) appreciated for the availability of its  
66 powerful genetic tools, biosafety and fast growth rate has been used extensively in

67 synthetic biology for industrial purposes. High-throughput phenotypic screenings have  
68 been employed to identify genome-wide deletions and duplications that increase the  
69 yield of yeast synthetic biology products. The completion of the yeast gene-knockout  
70 collection (YKOC) has enabled the analysis of synthetic genetic interactions(Puddu et  
71 al. 2019). The construction of segmental duplications covering the whole *S. cerevisiae*  
72 genome has been used to produce strains with enhanced tolerance to  
73 stresses(Natesuntorn et al. 2015). Many rational design strategies, including  
74 overexpression and downregulation, are time-consuming because identifying gene  
75 targets remains an challenge due to the complexity of genetic networks (Si et al.  
76 2015)[Rapid prototyping of microbial cell factories via genome-scale engineering.  
77 Biotechnol Adv 2015, 33:1420-1432.]. Many successful examples demonstrate that the  
78 synthetic yeast chromosome could be reprogrammed for various purposes with greatly  
79 enhanced metabolic capacity(Jia et al. 2018; Shen et al. 2018; Wu et al. 2018). The  
80 Synthetic Chromosome Rearrangement and Modification by LoxP-mediated Evolution  
81 (SCRaMbLE) technology have been developed to generate larger-scale SVs(Blount et  
82 al. 2018; Jia et al. 2018; Liu et al. 2018; Luo et al. 2018; Shen et al. 2018; Wang et al.  
83 2018; Wu et al. 2018; Li et al. 2019; Ma et al. 2019; Gowers et al. 2020). SCRaMbLE  
84 is a powerful approach to study how chromosomal architecture impacts phenotypes and  
85 can be to mimic the Darwinian evolution process in the test tube for targeted phenotypes.  
86 Thus, SCRaMbLE can be viewed as natural molecular tools for directed genome  
87 evolution by iterative rounds of mutagenesis and screening or selection on the genome  
88 scale. So far, SCAmbLE has been used for directed genome evolution mainly with

89 signal synthetic chromosome.

90 In this work we report that one by using SCaMbLE and two synthetic chromosomes,  
91 can for the first time creates chromosome inversion and translocation events on a larger  
92 scale and at a higher frequency. Introducing the same yeast cell with two synthetic  
93 chromosomes, each containing hundreds of non-directional loxPsym sites positioned  
94 downstream of non-essential genes and major landmarks provides a novel approach to  
95 genome reorganization especially SVs. We evaluate the effects of SVs on the enhanced  
96 production of an exogenous but commercially valuable terpenoid, astaxanthin. Two  
97 cycles of SCRaMbLE were used to iteratively generate complex SVs and improve the  
98 astaxanthin yield. We used the high-resolution chromosome conformational capture  
99 (Hi-C) sequencing approach to investigate the 3D conformations of chromosomes with  
100 complex SVs(Akdemir et al. 2020), and observed an inversion spanning the centromere  
101 and a translocation between synV and synX. We developed a method to precisely  
102 reconstitute the translocations and inversions, and recaptured their combined effects on  
103 increasing the yield of astaxanthin by 2.7-fold. Our work thus provides a new toolkit  
104 for directed evolution of genomic assembly and reorganization.

105

## 106 **Results**

### 107 **SCRaMbLE with two synthetic chromosomes for directed genome evolution**

108 To investigate more complex SVs and biosynthesis pathways, we used the haploid  
109 strain SYN510 containing both synV with 176 loxPsym sites(Xie et al. 2017) and synX  
110 with 245 loxPsym sites(Wu et al. 2017c) for the biosynthesis of astaxanthin.

111 Astaxanthin is the end metabolite of the MVA pathway; it has tremendous antioxidant  
112 activity and is widely used in nutraceuticals, cosmetics and aquaculture(Ambati et al.  
113 2014; Igielska-Kalwat et al. 2015). The astaxanthin biosynthesis pathway consists of 5  
114 genes. *CrtE*, *CrtI* and *CrtYB* are involved in carotenoid biosynthesis, after which a  
115 reticular metabolic pathway with  $\beta$ -carotene ketolase (*CrtW*) and  $\beta$ -carotene  
116 hydroxylase (*CrtZ*) performs a two-step hydroxylation and ketolation  
117 reaction(Supplementary information, Fig. 1a). Our previous study demonstrated that  
118 the combination of Aa\_ *CrtZ*–BDC263\_ *CrtW* showed lower intermediate accumulation  
119 and achieved better astaxanthin yield(Wang et al. 2017). To increase the stability of the  
120 astaxanthin biosynthesis pathway, all five genes were assembled together and integrated  
121 at the *YEL063C/CAN1* locus of *synV* to generate the yeast strain YJJ001 (Fig. 1a). It  
122 has been reported that the pCRE4 plasmid (pGal1-Cre-EBD-tCYC1) has tight control  
123 of Cre recombinase and can be used for Multiplex SCRaMbLE Iterative Cycling  
124 (MuSIC). Thus, the pCRE4 plasmid with a Ura3 marker was transformed into YJJ001  
125 for the control of SCRaMbLE.

126

127 In the first cycle of SCRaMbLE, strain YJJ168 was selected from the SCRaMbLEd  
128 yeast pool due to its dark red pigmentation (Supplementary information, Fig. 1b). To  
129 generate more complicated SVs and the desired phenotype, we used YJJ168 for the  
130 second cycle of SCRaMbLE to yield another SCRaMbLEd strain, YJJ432. To identify  
131 the chromosome SVs in haploids caused by SCRaMbLE, we deep sequenced YJJ168  
132 and YJJ432. As shown in Fig. 1a and Supplementary information, Fig. 2, a 3 kb deletion

133 (YJL218W-YJL217W), a 1 kb inversion (YER044C) and a 210 kb pericentric inversion  
134 (YJL052C-A-YJR071C) with 127 genes were observed in the SCRaMbLEd strain  
135 YJJ168. It is interesting that the upstream and downstream of inversions of YJL052C-  
136 A-YJR071C were on the left arm and right arm of synX, respectively. In other words,  
137 this inversion spanned the centromere of synX. As an iterated SCRaMbLEd strain from  
138 YJJ168, YJJ432 was observed to contain not only all the same SVs as YJJ168 but also  
139 a inversion of YJL170C-YJL158C and a trans-chromosomictranslocation. It is noted  
140 that the trans-chromosomictranslocation caused an exchange of 59 kb from the right  
141 arm of synV and 74 kb from the right arm of synX that had not previously been reported.  
142 From the sequencing data above, we find that the second-generation strains can inherit  
143 genotypic SVs from first-cycle SCRaMbLEd strains. PCR verification of novel  
144 junctions also confirmed that inversion and translocation events occurred in YJJ168 and  
145 YJJ432 (Supplementary information, Fig. 3).

146

147 To investigate the structural organization of the chromosome SVs, Hi-C contact maps  
148 (Fig. 1b) and 3D representations (Fig. 1c) of synV and synX were generated from  
149 YJJ001, YJJ168 and YJJ432. The contact maps of synV and synX in YJJ168 and  
150 YJJ432 showed several new interactions, indicating large-scale rearrangements in both  
151 SCRaMbLEd strains. YJJ168 exhibited a new interaction indicating a large inversion  
152 (YJL052C-A-YJR071C) event. The contact map of YJJ432 revealed three new  
153 interactions caused by the large inversion (YJL052C-A-YJR071C), one inversion  
154 (YJL170C-YJL158C) in synX and one translocation between the right arm of synV

155 (YJR130C) and the right arm of synX (YER164W). A three-dimensional model of the  
156 16 yeast chromosomes and amplified chromosomes of synV and synX are provided in  
157 Fig. 1c. The centromeres gather at the spindle pole, and all chromosomes are clustered  
158 by the centromeres at one pole of the nucleus. The telomeres are clustered at the other  
159 end. The 3D representations show that the average trajectories of chromosomes in  
160 YJJ168 and YJJ432 did not appear to be substantively altered compared with those in  
161 YJJ001, with the synthetic chromosomes neighboring the same chromosomes as the  
162 native ones. New connections were generated in synX of strain YJJ168 and strain  
163 YJJ432 due to the inversion spanning the centromere. In strain YJJ432, the right arms  
164 of synV and synX generate two new connections because of the translocation between  
165 synV and synX (the area within the dashed oval). It is indicated that the translocation  
166 on the right arm of synV has a closer spatial distance with synX and consequently has  
167 stronger interactions.

168

169 Meanwhile, the two SCRaMbLEd strains and YJJ001 were subjected to fermentation  
170 experiments in YPD medium, and the astaxanthin yield was analyzed by high-  
171 performance liquid chromatography (HPLC). As illustrated in Fig. 1d, the astaxanthin  
172 yield in strain YJJ001 was 0.61 mg/g DCW, and the astaxanthin yield of the two  
173 SCRaMbLEd strains (YJJ168 and YJJ432) was increased, to 0.90 and 2.7 mg/g DCW,  
174 respectively. The astaxanthin yield was increased 1.48- to 4.43-fold in the SCRaMbLEd  
175 strains compared with the nonSCRaMbLEd parent strain. These results revealed the  
176 new interactions of synthetic chromosomes in SCRaMbLEd strains via Hi-C



177 technology. SCRaMbLE strains provide sufficiently detectable SVs, indicating that the  
178 SCRaMbLE system provides a driving force to alter cell phenotypes through  
179 rearranging gene order and number.

180

### 181 **Reorganization of the genetic information on the regions of SVs**

182 The pericentric inversion and trans-chromosomal translocation alter the spatial  
183 positions of the breakpoint-flanking regions, which may which may led to large  
184 reorganization of the genetic information along the chromosomes. To explore whether  
185 the genetic information in the breakpoint-flanking regions were affected, we examined  
186 transcription profile on the 20 kb regions upstream and downstream of the two loxPsym  
187 breakpoints. As shown in Fig. 2a, the upstream and downstream regions of the  
188 breakpoints of the pericentric inversion in YJJ168 were named A, B, C, and D,  
189 respectively. We first observed changes in the transcription levels of YJL053W,  
190 YJL052C-A and YJL052W near the left breakpoint and the transcription levels of  
191 YJL067C, YJL070C and YJL071W near the right breakpoint. In the whole 80 kb region  
192 consisting of A, B, C and D, 19 of 51 genes showed changes in expression compared  
193 with the control strain YJJ001(Log2FoldChange > 1-fold), with 1 gene of YJL052W  
194 downregulated and 18 genes (YJL053W, YJL052C-A, YJL049W, YJL046W,  
195 YJL045W, YJR067C, YJR068W, YJR070C, YJR071W, YJR072C, YJR076C,  
196 YJR079W, YJR080C, YJR082C, YJR085C, YJR086C, YJR087W and YJR088C)  
197 upregulated, respectively. Around the left breakpoint, the changes in YJL052C-A and  
198 YJL052W were the most obvious, whereas around the right arm recombination site, the

199 change in YJR070C was the most obvious. Similarly, the regions upstream and  
200 downstream of the breakpoint in the right arm of synV and the breakpoint in the right  
201 arm of synX in YJJ432 were labeled E, F, G, and H, respectively (Fig. 2b). Compared  
202 with the control strain, 14 of the 38 genes in these regions exhibited changed  
203 expression( $\text{Log}_2\text{FoldChange} > 1\text{-fold}$ ), with 2 genes (YER158C and YJR127C)  
204 downregulated and 12 genes (YER156C, YER163C, YER168C, YER170W, YJR122W,  
205 YJR123W, YJR125C, YJR129C, YJR133W, YJR135C, YJR135W-A, YJR136C)  
206 upregulated, respectively. The results indicated that the expression of genes in the  
207 breakpoint-flanking regions was indeed affected by different types of SVs. To further  
208 quantify the interactions of the recombination sites, we counted the interaction values  
209 of the four points on the interaction matrix of YJJ168 and YJJ432 and counted the  
210 differences between different interaction domains (areas marked by boxes in  
211 Supplementary information, Fig. 4). As the results show, regions A and C and regions  
212 B and D had significant interactions in inversion strains YJJ168 and YJJ432. In  
213 translocation strain YJJ432, the interactions of regions E and H and F and G were  
214 increased as a result of the greater proximity of the right arm of synV (YJR130C) to  
215 synX and the right arm of synX (YER164W) to synV. These results further indicate that  
216 two sites that are closer in space have greater interaction. It is spectacular that the  
217 pericentric inversions and trans-chromosomes translocation changed larger number of  
218 genes position and the transcription direction, which affected the transcription levels of  
219 genes in the regions nearby the breakpoint of SVs(Wu et al. 2017b).

220 **Mapping of genetic targets contributing to higher astaxanthin yield**

221 To identify the genetic targets with regard to the improvement of astaxanthin yield, the  
222 above down-regulated genes and up-regulated genes in the regions nearby the  
223 breakpoint of SVs were knocked out and overexpressed in the strain YJJ001 for  
224 fermentation assay, respectively (Table 1). As illustrated in Fig. 3a, compared to the  
225 control strain, astaxanthin yields were significantly increased in strains with YJR086W,  
226 YJR123W and YJR135C over-expression strain. The function of these three genes are  
227 briefly described in Table 2. Although the exact reason for these genes to be beneficial  
228 to astaxanthin yield remains to be elucidated, it is possible to speculate the mechanism  
229 resulting in the favorable changes of this phenotype from functions previously  
230 described in the literature. The result indicated upregulated these genes have  
231 contributed to higher astaxanthin yield.

232 To further explore the global affection of chromosomal rearrangements on metabolic  
233 pathways, enrichment analysis of transcriptomics was used to identify differentially  
234 transcribed genes with known functions involved in KEGG pathways. Several genes  
235 involved in terpenoid backbone biosynthesis, ergosterol biosynthesis and citrate cycle  
236 were upregulated in the YJJ168 and YJJ432 (Fig. 3b). In SCRaMbLED strain YJJ168,  
237 the upregulated genes *ERG24*, *ERG25*, *ERG26* and *ERG27* were involved in ergosterol  
238 biosynthesis, while *ERG10*, *ERG20* and *BTS1* were involved in terpenoid backbone  
239 biosynthesis. In YJJ432, *ERG24*, *ERG26* and *ERG27*, which are involved in the  
240 biosynthesis of ergosterol, and *ERG10*, *ERG12*, *ERG20* and *BTS1*, which are involved  
241 in terpenoid backbone biosynthesis, were found to be upregulated. As a consequence,  
242 these two pathways could increase the flux of the MVA pathway and cell storage

243 capacity of hydrophobic carotenoids(Gao et al. 2017; Wu et al. 2017a). The  
244 improvement of citrate cycle could provide sufficient reducing power and energy for  
245 the MVA pathway. These transcriptome analyses indicated that the improved yield of  
246 astaxanthin was caused by the upregulation of these genes, further clarifying the direct  
247 effect of the SVs on astaxanthin accumulation. The results demonstrated the SVs can  
248 led to large reorganization of the genetic information along the chromosomes and  
249 accelerate the directed genome evolution with selection of targeted phenotypes.

250

### 251 **Rational introduction of inversion and translocation in yeast**

252 To verify the effect of the pericentric inversion and trans-chromosomal translocation,  
253 we developed a method to rationally generate these inversions and translocations. First,  
254 we constructed an astaxanthin-producing strain named YJJ468 from the wild-type  
255 strain BY4741 by integrating the biosynthesis pathway of astaxanthin at the  
256 *YEL063C/CAN1* locus of chromosome V. Then, we designed an on/off switch  
257 consisting of two markers (URA3 and Hyg). As shown in Fig. 4a, the URA3 promoter  
258 was inserted upstream of loxP site 1, and the open reading frame of URA3 was inserted  
259 downstream of loxP site 1, allowing the expression of URA3. Hyg without a promoter  
260 was positioned immediately downstream of loxP site 2. A complete HIS3 marker was  
261 positioned upstream of loxP site 2 as a selection marker to help loxP-Hyg integrate into  
262 the chromosome. The pGal1-Cre-EBD-tCYC1 plasmid with a G418 marker was  
263 transformed into strain YJJ468 (Supplementary Fig. 7). The activation of Cre  
264 recombinase will catalyze the recombination of the two loxP sites, leading to a change

265 in the phenotype of the yeast from Hyg<sup>-</sup> to Hyg<sup>+</sup>. Consequently, hygromycin media  
266 could be used to select translocation and inversion strains. Using the above approach,  
267 strain YJJ473 with pericentric inversion and strain YJJ474 with trans-chromosomal  
268 translocation were generated and isolated by screening on SC-hygromycin agar plates.  
269 Strains YJJ473 and YJJ474 were further analyzed using whole-genome sequencing to  
270 verify the genomic variations produced by the recombination. As Fig. 4a shows, the  
271 inversion and translocation region had breakpoints at the loxP sites in YJJ473 and  
272 YJJ474, indicating that the desired inversion and translocation were artificially  
273 recreated from the wild-type strain YJJ468.

274 Meanwhile, PCR was used to further verify the inversion and translocation. Before  
275 recombination, sequences in YJJ468 could be amplified by primer pairs 1/2, 3/4, 5/6,  
276 and 7/8. After recombination, sequences in YJJ473 could be amplified by primer pairs  
277 1/3 and 2/4, while sequences in YJJ474 could be amplified by primer pairs 5/8 and 6/7  
278 (Fig. 4b). Therefore, we can confirm that inversion and translocation events occurred  
279 in YJJ473 and YJJ474. Compared to the initial strain yJJ468, YJJ473 and YJJ474 had  
280 enhanced astaxanthin production phenotypes, yielding 1.11 mg/g DCW and 1.28 mg/g  
281 DCW, respectively, which were similar to those of the SCRaMbLEd strains (Fig. 4c).  
282 YJJ473 and YJJ474 increased the astaxanthin yield 1.8- and 2.1-fold relative to the  
283 parent strain YJJ468. These results indicated that the YJL052C-A-YJR071C inversion  
284 and YJR130C-YER164W translocation increased the production of astaxanthin and  
285 were responsible for the enhanced astaxanthin production phenotypes of SCRaMbLE  
286 strains yJJ168 and yJJ432. The results indicated that the YJL052C-A-YJR071C

287 inversion and YJR130C-YER164W translocation contributed to the improvement of  
288 astaxanthin production. It is anticipated that we can use the model learned from the  
289 random screen of SCRaMbLE and successfully harness the precise introduction of  
290 pericentric inversions and trans-chromosomal translocation by rational design.

291

## 292 **Discussion**

293 Our study focused on investigating complex chromosome SVs by enabling haploid  
294 yeast containing multiple synthetic chromosomes to be SCRaMbLED, which has  
295 significant advantages over pre-existing methods for laboratory evolution. First,  
296 traditional evolution approaches, such as physical mutagenesis or chemical  
297 mutagenesis, typically cause hundreds of single nucleotide polymorphisms (SNPs) or  
298 insertions and deletions (indels)(Jin et al. 2018), which make it difficult to confirm the  
299 targets responsible for observed changes in phenotypes. In comparison, SCRaMbLE  
300 has been demonstrated to rapidly generate larger scale SVs, providing clear targets to  
301 verify and understand more deeply. In this study, we have demonstrated that pathway-  
302 doubling is not the only way to increase yield (Jia et al. 2018), changes in map position  
303 and direction of endogenous genes can also affect yield. Second, the synthetic yeast  
304 project (Sc2.0) aims to synthesize 16 yeast chromosomes, each of which contains  
305 hundreds of loxP sites, downstream of every nonessential gene. Our research has  
306 shown that SCRaMbLE with two synthetic chromosomes can generate translocations  
307 between two synthetic chromosomes. Thus, it is anticipated that the integration of  
308 multiple synthetic chromosomes will extend the diversity and quantity of SVs.

309 Moreover, SCRaMbLE with multiple synthetic chromosomes provided a powerful  
310 model in which to investigate the trajectory of chromosome SVs during iterative  
311 evolution. In this study, YJJ432 not only inherited the inversion spanning the  
312 centromere from YJJ168 but also acquired new genetic changes, namely, a translocation  
313 between two synthetic chromosomes.

314

315 The SCRaMbLE system provided sufficiently large structural variations to allow us to  
316 analyze novel interactions and structures via Hi-C technology. The translocation strain  
317 YJJ474 on the right arm of synV (YJR130C) has a closer spatial distance with synX  
318 and consequently has stronger interactions. Chromosomal SVs cause changes in the 3D  
319 architecture of the genome and potentially alter cellular functions. The development of  
320 the 3C technique and its derivatives has provided a toolbox that enables the systematic  
321 spatial interrogation of multiple loci or even the entire genome(Lieberman-Aiden et al.  
322 2009; Dekker et al. 2013). Based on genome-wide high-throughput chromosome  
323 conformation capture (Hi-C) technology, a 2D heat map can be constructed to indicate  
324 the frequency of interaction between two points in the genome. Depending on their  
325 positions, SVs often change the Hi-C profile of a locus, leaving specific signatures that  
326 can be analyzed further(Burton et al. 2013; Bianco et al. 2018). For example, deletions  
327 can result in novel interactions between two regions that were previously separated,  
328 whereas inversions result in a characteristic ‘bow tie’ configuration when mapped onto  
329 a reference genome. Furthermore, owing to its proximity-ligation nature, the Hi-C is  
330 also suitable for the identification of SVs without a priori knowledge(Rickman et al.

331 2012; Burton et al. 2013; Rao et al. 2014; Harewood et al. 2017).

332

333 SCRaMbLEing two synthetic chromosomes generated random and complex SVs,  
334 which reshaped chromosomes 3D architecture. Duan et al reported that the genome 3D  
335 structure affected genes expressions(Duan et al. 2010) It is known that telomeres and  
336 centromeres could inhibit the expression of genes nearby (Chen and Zhang 2016), while  
337 the autonomously replicating sequence (ARS) could increase the expression of genes  
338 nearby(Flagfeldt et al. 2009). In the study, the pericentric inversions and trans-  
339 chromosomes translocation changed the map position of centromeres in chromosome  
340 X and caused the exchange of the right telomeres of chromosome V with chromosome  
341 X, respectively. Thus, larger number of genes position and the transcription direction,  
342 which affected the transcription levels of genes in the regions nearby the breakpoint of  
343 SVs. It is demonstrated that over-expression of YJR086W(STE18), YJR123W(RPS5)  
344 and YJR135C(MCM22) improved astaxanthin yield. Choudhury et al show that  
345 phosphorylation of the yeast Gg subunit (Ste18) can serve as intrinsic regulators of G  
346 protein signaling and differentially activates mitogen-activated protein kinases  
347 (MAPKs) pathway (Choudhury et al. 2018), which potentially mediates the activation  
348 of some transcription factors and metabolic network related to the astaxanthin  
349 biosynthesis. Ghosh et al reported Rps5 is an essential gene coding a protein component  
350 of the small (40S) ribosomal subunit. Over-expression of Rps5 potentially impact the  
351 translation initiation of yeast *S. cerevisiae* (Saliba et al. 2014), which may increase the  
352 translation of some genes being beneficial to the astaxanthin biosynthesis. Poddar et al



353 demonstrated MCM22 involved in chromosome segregation, mutations of which  
354 caused a decrease in the stability of the minichromosome . Over-expression of MCM22  
355 potentially maintained the stability of chromosome during segregation and enhanced  
356 the cell viability during fermentation(Poddar et al. 1999). The exact mechanism of over-  
357 expression of STE18, RPS5 and MCM22 contributing to astaxanthin biosynthesis is  
358 unknown, however, upregulation of these genes may be beneficial for tuning metabolic  
359 network, the translation initiation process and stability of chromosome during  
360 segregation, which may explain why this genes affects astaxanthin biosynthesis.

361

362 In this manuscript, we have developed both a random method and a rational method to  
363 generate complex SVs. The random method uses SCRaMbLE in yeast with two  
364 synthetic chromosomes to generate yeast libraries containing complex SVs for  
365 screening desired phenotypes. The rational method enables a selection marker to switch  
366 from transcriptionally “off” to transcriptionally “on”. The rational method provides a  
367 convenient way to determine the effects of translocation and inversion targets on strain  
368 phenotypes. In addition, inversion and translocation strains generated from wild-type  
369 strains can be used as materials to study open genetic questions, such as whether  
370 inversion and translocation strains become reproductively isolated from control strains.  
371 By this method, we validated a larger fragment translocation (right arm of synV  
372 (YJR130C) and right arm of synX (YER164W)) and an inversion (YJL052C-A-  
373 YJR071C) in wild-type strains and found that both the translocation and inversion  
374 increased the yield of astaxanthin. This strategy is potentially a powerful tool for

375 inducing the recombination of any two positions on chromosomes. How nature evolves  
376 with great biodiversity and nurtures organisms containing various numbers of  
377 chromosomes is not known. Our work may spark interest and provide a new handle for  
378 researchers to study this fundamental biological problem.

379

380

381

## 382 **Methods**

### 383 **Strains and media.**

384 All yeast strains used in this study are described in Table 1. The strain SYN VX carries  
385 a *synV*, and a *synX* is derived from BY4741 (*MATa leu2Δ0 met15Δ0 ura3Δ0 his3Δ1*).  
386 BY4741 was used as the initial strain to reconstruct the translocations and inversions  
387 caused by SCRaMble of the strains and verify targets of astaxanthin yield  
388 improvement.

389 Yeast strains were cultured in YPD medium (10 g l<sup>-1</sup> yeast extract, 20 g l<sup>-1</sup> peptone,  
390 and 20 g l<sup>-1</sup> glucose). SGal-Ura (synthetic media lacking uracil with 20 g l<sup>-1</sup> galactose)  
391 with 1 μM β-estradiol was used to induce SCRaMble. SC medium containing 1 g l<sup>-1</sup>  
392 5-FOA was used to screen strains without the URA3 marker. All yeast solid media  
393 contained 20 g l<sup>-1</sup> agar. β-Estradiol and 5-FOA were purchased from Sigma-Aldrich.  
394 *E. coli* DH5α purchased from BEIJING Biomed Co., Ltd. was used for plasmid  
395 construction and replication. *E. coli* were cultivated at 37 °C in Luria–Bertani (LB)  
396 complete medium. Kanamycin (50 μg/mL) or ampicillin (100 μg/mL) was added to the  
397 medium for selection.

398

### 399 **Construction of plasmids and strains.**

400 YJJ001 (astaxanthin-producing control strain) was constructed by homologous  
401 recombination in SYN VX, directed by 500-bp CAN1 and 500-bp delta site genomic  
402 sequences flanking *crtE-crtI-crtYB-crtZ-crtW-LEU2*. YJJ002 was constructed by  
403 transforming YJJ001 with pCRE4 (Supplementary Fig. 1, Supplementary Data 2),

404 followed by selection on SC-URA agar. Overexpression plasmids were constructed by  
405 Gibson assemble. The gene knockout cassette (left homologous arm-URA3-right  
406 homologous arm) was assembled by overlap extension PCR (OE-  
407 PCR). Transformations were performed using the standard lithium acetate  
408 procedure (Gietz et al. 1995).

409

#### 410 **SCRaMbLE.**

411 YJJ002 containing the inducible Cre plasmid pGal1-Cre-EBD-tCYC1 was grown  
412 overnight in 5 mL SC-Ura media (30 °C, 250 r.p.m. shaking). Then, the cells were  
413 harvested and washed three times with sterile water to wash out glucose, and the culture  
414 was diluted to an OD<sub>600</sub> of 0.6-1.0 in 3 mL SGal-Ura medium. Then, 1 μmol L<sup>-1</sup> β-  
415 estradiol was added to the cultures to induce SCRaMbLE for 6 h (30 °C, 250 r.p.m.  
416 shaking). Cells were washed twice by centrifugation, resuspended in sterile water,  
417 diluted 5,000-fold, and plated on SC-Ura. The plates were incubated at 30 °C for 60 h.

418

#### 419 **HPLC analysis of astaxanthin production.**

420 SCRaMbLE strains with darker colors were selected for fermentation in shake flasks.  
421 Three independent colonies of each strain were inoculated into 5 ml of YPD medium  
422 and grown at 30 °C until the OD<sub>600</sub> ≈ 8.0 (approximately 24 h). Then, the seed culture  
423 was transferred into 50 mL fresh YPD with 40 g l<sup>-1</sup> glucose medium at an initial OD  
424 600 of 0.1 and grown until ready to harvest.

425 Astaxanthin was extracted from HCl-heat treated cells with acetone according to Zhou

426 et al. (Zhou et al. 2015) and Wang et al. (Wang et al. 2017) . Carotenoids were extracted  
427 as described below. Cells from 2 mL culture were collected and washed with distilled  
428 water. Then, the cells were resuspended in 1 mL of 3 M HCl, boiled for 5 min, and  
429 subsequently cooled in an ice bath for 5 min. After that, the cell debris was washed  
430 twice with distilled water and resuspended in 0.5 mL of acetone containing 1% (wv<sup>-1</sup>)  
431 butylated hydroxytoluene. Then, the mixture was vortexed until colorless  
432 (approximately 20 min) and incubated at 30 °C for 10 min. This was followed by  
433 centrifugation at 12,000 rpm for 5 min. The acetone phase containing the extracted  
434 astaxanthin was filtered through a 0.22- $\mu$ m membrane for HPLC analysis.

435

#### 436 **PCRTags analysis.**

437 All the synV and synX PCRTags involved in this study are listed in Supplementary  
438 Table 2. Amplification of PCRTags was performed using 7.5  $\mu$ L 2  $\times$  Rapid Taq Master  
439 Mix (Vazyme Biotech Co., Ltd), 0.4  $\mu$ L each of forward and reverse primers, 1  $\mu$ L  
440 genomic DNA, and 5.7  $\mu$ L ddH<sub>2</sub>O. The reaction procedure was as follows: 95 °C/1 min,  
441 35 cycles of 95 °C/20 s, 53 °C/20 s, 72 °C/15 s and a final extension of 72 °C/5 min.  
442 Detection of PCRTags was performed by gel electrophoresis.

443

#### 444 **Whole-genome sequencing (WGS) and analysis.**

445 WGS was performed at BGI (Beijing Genomic Institute in Shenzhen, China), and cells  
446 were harvested at exponential phase. Libraries were prepared and analyzed using an  
447 Illumina HiSeq X-Ten system. The sequencing data were filtered with SOAPnuke

448 (v1.5.2)(Li et al. 2008). and clean reads were stored in FASTQ format for downstream  
449 analysis. The read comparison was performed using BWA software with the reference  
450 sequence. SVs including insertions, deletions, inversions, intrachromosomal  
451 translocations, and interchromosomal translocations were detected using Break-Dancer  
452 software.

453

#### 454 **Transcriptional analysis.**

455 Yeast cells were harvested from YPD medium at 24 h (exponential phase). Total RNA  
456 was extracted using the TRIzol® method following the NEB Next Ultra™ RNA  
457 protocol. The concentration of the extracted RNA samples was determined using a  
458 NanoDrop system (NanoDrop, Madison, USA), and the integrity of the RNA was  
459 examined based on the RNA integrity number (RIN) determined using an Agilent 2100  
460 Bioanalyzer (Agilent, Santa Clara, USA). RNA sequencing was carried out by the  
461 BGISEQ500 platform (BGI-Shenzhen, China). The sequencing data were filtered with  
462 SOAPnuke (v1.5.2)(Li et al. 2008)

463 Clean reads were obtained and stored in FASTQ format. The clean reads were mapped  
464 to the reference genome using HISAT2 (v2.0.4)(Kim et al. 2015). Bowtie2  
465 (v2.2.5)(Langmead and Salzberg 2012) was applied to align the clean reads to the  
466 reference coding gene set, and the expression level of each gene was calculated by  
467 RSEM (v1.2.12)(Li and Dewey 2011). The heatmap of the gene expression in different  
468 samples was drawn by GraphPad Prism (v8.0.1). Essentially, differential expression  
469 analysis was performed using DESeq2 (v1.4.5)(Love et al. 2014) with a Q value  $\leq$

470 0.05. To gain insight into the change in phenotype, GO (<http://www.geneontology.org/>)  
471 and KEGG (<https://www.kegg.jp/>) enrichment analyses of annotated differentially  
472 expressed genes were performed by Phyper  
473 ([https://en.wikipedia.org/wiki/Hypergeometric\\_distribution](https://en.wikipedia.org/wiki/Hypergeometric_distribution)) based on the  
474 hypergeometric test. Significant terms and pathways were identified as those with  
475 Bonferroni-corrected *P*-values below a rigorous threshold (*P*-value  $\leq$  0.05). Triplicate  
476 samples were used for transcriptional analysis. The Saccharomyces Genome Database  
477 (SGD)(Cherry et al. 2012) was used to obtain gene information.

478

#### 479 **Hi-C library generation and sequencing.**

480 Hi-C library generation and sequencing were carried out by Frasergen (Wuhan, China),  
481 and cells were harvested at exponential phase. Cells were resuspended in 1×PBS to an  
482 OD600 of 1.0. Cells were cross-linked in a 3% final concentration of fresh  
483 formaldehyde and quenched with glycine (0.15 M final concentration) for 5 min. The  
484 cells were resuspended in 1 mL of 1× NEBuffer 2.1 (NEB) and homogenized by  
485 grinding to a fine powder in liquid nitrogen. Then, the homogenized yeast material was  
486 washed with 25 mL of 1× NEBuffer 2.1 and suspended in 2.5 mL of 1× NEBuffer 2.1.  
487 Cells were split into aliquots ( $V = 456 \mu\text{L}$ ) and solubilized in 0.1% SDS for 10 min at  
488 65 °C. Cross-linked DNA was digested with 200 U MboI (NEB) per tube at 37 °C  
489 overnight. Restriction fragment ends were labeled with biotinylated cytosine  
490 nucleotides by biotin-14-dCTP (TriLINK). Blunt-end ligation was carried out at 16 °C  
491 overnight in the presence of 100 Weiss units of T4 DNA ligase (Thermo, 10.0 mL final

492 volume per tube).

493 DNA purification was achieved through overnight incubation at 65 °C with 200 µg/mL  
494 proteinase K (Thermo). Purified DNA was sheared to a length of ~400 bp. Point ligation  
495 junctions were pulled down by Dynabeads® MyOne™ Streptavidin C1 (Thermo  
496 Fisher). The Hi-C library for Illumina sequencing was prepared using the NEBNext®  
497 Ultra™ II DNA library Prep Kit for Illumina (NEB) according to the manufacturer's  
498 instructions. Fragments of between 400 and 600 bp were paired-end sequenced on an  
499 Illumina HiSeq X10 platform (San Diego, CA, United States) in 150PEmode. Two  
500 replicates were generated for each group of materials.

501

#### 502 **Construction of contact map.**

503 The contact maps were generated using the ICE software package (version  
504 1f8815d0cc9e)(Imakaev et al. 2012), and the Hi-C data of YJJ001, YJJ168 and YJJ432  
505 cells were iteratively mapped to their own genomes. Dangling ends and other unusable  
506 data were filtered out, and the valid pairs were binned into 10 kb nonoverlapping  
507 genomic intervals to generate contact maps. The contact maps were normalized using  
508 an iterative normalization method to eliminate systematic biases.

509

#### 510 **Cre/loxP induced chromosome translocation and inversion.**

511 Translocations and inversions were detected in YJJ168 and YJJ432 and verified in the  
512 wild-type strain BY4741 by introducing two Cre/loxP sites to the corresponding  
513 position. LoxP sites were integrated by homologous recombination. Homologous arms



514 upstream and downstream were amplified from the genome of BY4741. Two loxP sites  
515 (loxP site 1 and loxP site 2) were integrated along with URA3<sup>+</sup> and HIS3<sup>+</sup>/Hyg<sup>-</sup> as  
516 selection markers. The URA3 promoter was inserted upstream of loxP site 1, and open  
517 reading frames of URA3 were inserted downstream of the loxP site, allowing the  
518 expression of URA3. Hyg without a promoter was positioned adjacent to downstream  
519 loxP site 2 and the HIS3 promoter, and open reading frames of HIS3 were positioned  
520 upstream of loxP site 2. Adding 1  $\mu$ mol L<sup>-1</sup>  $\beta$ -estradiol to the cultures to switch on Cre-  
521 mediated recombination between the two loxP sites results in translocation and  
522 inversion, which subsequently turn on the expression of the Hyg gene and  
523 simultaneously shut down URA3 expression. Translocation and inversion strains could  
524 be selected on SC-LEU-5-FOA plates and SC-LEU+Hyg.

#### 525 **Data availability.**

526 The data that support the findings of this study are available from the corresponding  
527 author on request. Transcriptomes data and Whole-genome sequencing data are  
528 available at Sequence Read Archive (SRA) under accession code SUB8866811.

#### 529 **Acknowledgements**

530 This work was funded by Ministry of science and technology the National Key  
531 Research and Development Program of China (2021YFC2100800), and the National  
532 Natural Science Foundation of China (31800719, 31861143017 and 21621004).

#### 533 **Author contributions**

534 B.J., and J.J. contributed equally to this work. B.J., J.J., and Y.J.Y. designed the  
535 experiments. B.J., J.J., and M.Z.H performed the experiments. B.J., J.J., and Y.J.Y.

536 wrote the manuscript and all authors edited the manuscript. This project was supervised

537 by Y.J.Y.

### 538 **Conflict of Interest**

539 The authors declare no competing financial interests.

### 540 **Reference**

541 Akdemir KC, Le VTT, Chandran S, Li YL, Verhaak RG, Beroukhim R, Campbell PJ, Chin L, Dixon JR,

542 Futreal PA et al. 2020. Disruption of chromatin folding domains by somatic genomic

543 rearrangements in human cancer. *Nature Genetics* **52**: 294-+.

544 Ambati RR, Phang SM, Ravi S, Aswathanarayana RG. 2014. Astaxanthin: Sources, Extraction,

545 Stability, Biological Activities and Its Commercial Applications-A Review. *Mar Drugs* **12**:

546 128-152.

547 Bianco S, Lupianez DG, Chiariello AM, Annunziatella C, Kraft K, Schopflin R, Wittler L, Andrey G,

548 Vingron M, Pombo A et al. 2018. Polymer physics predicts the effects of structural

549 variants on chromatin architecture. *Nature Genetics* **50**: 662-+.

550 Blount BA, Gowers GOF, Ho JCH, Ledesma-Amaro R, Jovicevic D, McKiernan RM, Xie ZX, Li BZ,

551 Yuan YJ, Ellis T. 2018. Rapid host strain improvement by in vivo rearrangement of a

552 synthetic yeast chromosome. *Nature Communications* **9**.

553 Brachmann CB, Davies A, Cost GJ, Caputo E, Li J, Hieter P, Boeke JD. 1998. Designer deletion

554 strains derived from *Saccharomyces cerevisiae* S288C: a useful set of strains and

555 plasmids for PCR-mediated gene disruption and other applications. *Yeast* **14**: 115-132.

556 Burton JN, Adey A, Patwardhan RP, Qiu RL, Kitzman JO, Shendure J. 2013. Chromosome-scale

557 scaffolding of de novo genome assemblies based on chromatin interactions. *Nat*

- 558 *Biotechnol* **31**: 1119-+.
- 559 Chen X, Zhang J. 2016. The Genomic Landscape of Position Effects on Protein Expression Level  
560 and Noise in Yeast. *Cell Syst* **2**: 347-354.
- 561 Cherry JM, Hong EL, Amundsen C, Balakrishnan R, Binkley G, Chan ET, Christie KR, Costanzo MC,  
562 Dwight SS, Engel SR et al. 2012. Saccharomyces Genome Database: the genomics  
563 resource of budding yeast. *Nucleic Acids Research* **40**: D700-D705.
- 564 Choudhury S, Baradaran-Mashinchi P, Torres MP. 2018. Negative Feedback Phosphorylation of  
565 Ggamma Subunit Ste18 and the Ste5 Scaffold Synergistically Regulates MAPK Activation  
566 in Yeast. *Cell Rep* **23**: 1504-1515.
- 567 Conrad DF, Pinto D, Redon R, Feuk L, Gokcumen O, Zhang YJ, Aerts J, Andrews TD, Barnes C,  
568 Campbell P et al. 2010. Origins and functional impact of copy number variation in the  
569 human genome. *Nature* **464**: 704-712.
- 570 Darling AE, Miklos I, Ragan MA. 2008. Dynamics of Genome Rearrangement in Bacterial  
571 Populations. *PLoS Genet* **4**: 16.
- 572 Dekker J, Marti-Renom MA, Mirny LA. 2013. Exploring the three-dimensional organization of  
573 genomes: interpreting chromatin interaction data. *Nature Reviews Genetics* **14**: 390-  
574 403.
- 575 Duan Z, Andronescu M, Schutz K, McIlwain S, Kim YJ, Lee C, Shendure J, Fields S, Blau CA, Noble  
576 WS. 2010. A three-dimensional model of the yeast genome. *Nature* **465**: 363-367.
- 577 Dujon B. 2010. Yeast evolutionary genomics. *Nature Reviews Genetics* **11**: 512-524.
- 578 Dujon B, Sherman D, Fischer G, Durrens P, Casaregola S, Lafontaine I, De Montigny J, Marck C,  
579 Neuvéglise C, Talla E et al. 2004. Genome evolution in yeasts. *Nature* **430**: 35-44.

- 580 Eyupoglu D, Bozkurt S, Haznedaroglu I, Buyukasik Y, Guven D. 2016. The Impact of Variant  
581 Philadelphia Chromosome Translocations on the Clinical Course of Chronic Myeloid  
582 Leukemia. *Turkish Journal of Hematology* **33**: 60-65.
- 583 Flagfeldt DB, Siewers V, Huang L, Nielsen J. 2009. Characterization of chromosomal integration  
584 sites for heterologous gene expression in *Saccharomyces cerevisiae*. *Yeast* **26**: 545-551.
- 585 Fleiss A, O'Donnell S, Fournier T, Lu W, Agier N, Delmas S, Schacherer J, Fischer G. 2019.  
586 Reshuffling yeast chromosomes with CRISPR/Cas9. *PLoS Genet* **15**: e1008332.
- 587 Gao SL, Tong YY, Zhu L, Ge M, Zhang YA, Chen DJ, Jiang Y, Yang S. 2017. Iterative integration of  
588 multiple-copy pathway genes in *Yarrowia lipolytica* for heterologous beta-carotene  
589 production. *Metab Eng* **41**: 192-201.
- 590 Gietz RD, Schiestl RH, Willems AR, Woods RA. 1995. Studies on the transformation of intact yeast  
591 cells by the LiAc/SS-DNA/PEG procedure. *Yeast (Chichester, England)* **11**: 355-360.
- 592 Gowers GOF, Chee SM, Bell D, Suckling L, Kern M, Tew D, McClymont DW, Ellis T. 2020.  
593 Improved betulinic acid biosynthesis using synthetic yeast chromosome recombination  
594 and semi-automated rapid LC-MS screening. *Nature Communications* **11**.
- 595 Harewood L, Kishore K, Eldridge MD, Wingett S, Pearson D, Schoenfelder S, Collins VP, Fraser P.  
596 2017. Hi-C as a tool for precise detection and characterisation of chromosomal  
597 rearrangements and copy number variation in human tumours. *Genome Biology* **18**: 11.
- 598 Henssen AG, Koche R, Zhuang J, Jiang E, Reed C, Eisenberg A, Still E, MacArthur IC, Rodriguez-  
599 Fos E, Gonzalez S et al. 2017. PGBD5 promotes site-specific oncogenic mutations in  
600 human tumors. *Nature Genetics* **49**: 1005-+.
- 601 Igielska-Kalwat J, Goscianska J, Nowak I. 2015. Carotenoids as natural antioxidants. *Postepy*

602 *higieny i medycyny doswiadczonej (Online)* **69**: 418-428.

603 Imakaev M, Fudenberg G, McCord RP, Naumova N, Goloborodko A, Lajoie BR, Dekker J, Mirny  
604 LA. 2012. Iterative correction of Hi-C data reveals hallmarks of chromosome  
605 organization. *Nat Methods* **9**: 999-+.

606 Jia B, Wu Y, Li B-Z, Mitchell LA, Liu H, Pan S, Wang J, Zhang H-R, Jia N, Li B et al. 2018. Precise  
607 control of SCRaMbLE in synthetic haploid and diploid yeast. *Nature Communications* **9**.

608 Jin J, Wang Y, Yao M, Gu X, Li B, Liu H, Ding M, Xiao W, Yuan Y. 2018. Astaxanthin  
609 overproduction in yeast by strain engineering and new gene target uncovering.  
610 *Biotechnology for Biofuels* **11**.

611 Kidd JM, Cooper GM, Donahue WF, Hayden HS, Sampas N, Graves T, Hansen N, Teague B, Alkan  
612 C, Antonacci F et al. 2008. Mapping and sequencing of structural variation from eight  
613 human genomes. *Nature* **453**: 56-64.

614 Kim D, Landmead B, Salzberg SL. 2015. HISAT: a fast spliced aligner with low memory  
615 requirements. *Nat Methods* **12**: 357-U121.

616 Langmead B, Salzberg SL. 2012. Fast gapped-read alignment with Bowtie 2. *Nat Methods* **9**:  
617 357-U354.

618 Li B, Dewey CN. 2011. RSEM: accurate transcript quantification from RNA-Seq data with or  
619 without a reference genome. *BMC Bioinformatics* **12**: 16.

620 Li RQ, Li YR, Kristiansen K, Wang J. 2008. SOAP: short oligonucleotide alignment program.  
621 *Bioinformatics* **24**: 713-714.

622 Li Y, Wu Y, Ma L, Guo Z, Xiao W, Yuan Y. 2019. Loss of heterozygosity by SCRaMbLEing. *Science*  
623 *China Life Sciences* **62**: 381-393.

- 624 Lieberman-Aiden E, van Berkum NL, Williams L, Imakaev M, Ragoczy T, Telling A, Amit I, Lajoie  
625 BR, Sabo PJ, Dorschner MO et al. 2009. Comprehensive Mapping of Long-Range  
626 Interactions Reveals Folding Principles of the Human Genome. *Science* **326**: 289-293.
- 627 Liu W, Luo Z, Wang Y, Pham NT, Tuck L, Pérez-Pi I, Liu L, Shen Y, French C, Auer M et al. 2018.  
628 Rapid pathway prototyping and engineering using in vitro and in vivo synthetic genome  
629 SCRaMbLE-in methods. *Nature Communications* **9**.
- 630 Love MI, Huber W, Anders S. 2014. Moderated estimation of fold change and dispersion for  
631 RNA-seq data with DESeq2. *Genome Biology* **15**: 38.
- 632 Luo Z, Wang L, Wang Y, Zhang W, Guo Y, Shen Y, Jiang L, Wu Q, Zhang C, Cai Y et al. 2018.  
633 Identifying and characterizing SCRaMbLEd synthetic yeast using ReSCuES. *Nature*  
634 *Communications* **9**.
- 635 Ma L, Li Y, Chen X, Ding M, Wu Y, Yuan Y-J. 2019. SCRaMbLE generates evolved yeasts with  
636 increased alkali tolerance. *Microbial Cell Factories* **18**.
- 637 Natesuntorn W, Iwami K, Matsubara Y, Sasano Y, Sugiyama M, Kaneko Y, Harashima S. 2015.  
638 Genome-wide construction of a series of designed segmental aneuploids in  
639 *Saccharomyces cerevisiae*. *Scientific Reports* **5**.
- 640 Nishikawa M, Ichiyama T, Hayashi T, Furukawa S. 1997. Mobius-like syndrome associated with a  
641 1;2 chromosome translocation. *Clinical genetics* **51**: 122-123.
- 642 Pang AW, MacDonald JR, Pinto D, Wei J, Rafiq MA, Conrad DF, Park H, Hurles ME, Lee C, Venter  
643 JC et al. 2010. Towards a comprehensive structural variation map of an individual human  
644 genome. *Genome Biology* **11**.
- 645 Peter J, De Chiara M, Friedrich A, Yue JX, Pflieger D, Bergstrom A, Sigwalt A, Barre B, Freil K,

- 646 Llored A et al. 2018. Genome evolution across 1,011 *Saccharomyces cerevisiae* isolates.  
647 *Nature* **556**: 339-+.
- 648 Pevzner P, Tesler G. 2003. Genome Rearrangements in mammalian evolution: Lessons from  
649 human and mouse genomes. *Genome Research* **13**: 37-45.
- 650 Poddar A, Roy N, Sinha P. 1999. MCM21 and MCM22, two novel genes of the yeast  
651 *Saccharomyces cerevisiae* are required for chromosome transmission. *Molecular*  
652 *Microbiology* **31**: 349-360.
- 653 Puddu F, Herzog M, Selivanova A, Wang SY, Zhu J, Klein-Lavi S, Gordon M, Meirman R, Millan-  
654 Zambrano G, Ayestaran I et al. 2019. Genome architecture and stability in the  
655 *Saccharomyces cerevisiae* knockout collection. *Nature* **573**: 416-+.
- 656 Rao SSP, Huntley MH, Durand NC, Stamenova EK, Bochkov ID, Robinson JT, Sanborn AL, Machol  
657 I, Omer AD, Lander ES et al. 2014. A 3D Map of the Human Genome at Kilobase  
658 Resolution Reveals Principles of Chromatin Looping. *Cell* **159**: 1665-1680.
- 659 Redon R, Ishikawa S, Fitch KR, Feuk L, Perry GH, Andrews TD, Fiegler H, Shapero MH, Carson AR,  
660 Chen WW et al. 2006. Global variation in copy number in the human genome. *Nature*  
661 **444**: 444-454.
- 662 Rickman DS, Soong TD, Moss B, Mosquera JM, Dlabal J, Terry S, MacDonald TY, Tripodi J,  
663 Bunting K, Najfeld V et al. 2012. Oncogene-mediated alterations in chromatin  
664 conformation. *Proceedings of the National Academy of Sciences of the United States of*  
665 *America* **109**: 9083-9088.
- 666 Saliba AE, Westermann AJ, Gorski SA, Vogel J. 2014. Single-cell RNA-seq: advances and future  
667 challenges. *Nucleic Acids Res* **42**: 8845-8860.

- 668 Selmecki AM, Maruvka YE, Richmond PA, Guillet M, Shores N, Sorenson AL, De S, Kishony R,  
669 Michor F, Dowell R et al. 2015. Polyploidy can drive rapid adaptation in yeast. *Nature*  
670 **519**: 349-352.
- 671 Shen MJ, Wu Y, Yang K, Li Y, Xu H, Zhang H, Li B-Z, Li X, Xiao W-H, Zhou X et al. 2018.  
672 Heterozygous diploid and interspecies SCRaMbLEing. *Nature Communications* **9**.
- 673 Si T, Xiao H, Zhao H. 2015. Rapid prototyping of microbial cell factories via genome-scale  
674 engineering. *Biotechnol Adv* **33**: 1420-1432.
- 675 Sotoudeh A, Rostami P, Nakhaeimoghadam M, Mohsenipour R, Rezaei N. 2017. Pericentric  
676 Inversion of Chromosome 9 in an Infant With Ambiguous Genitalia. *Acta medica Iranica*  
677 **55**: 655-657.
- 678 Wang J, Jia B, Xie ZX, Li YX, Yuan YJ. 2018. Improving prodeoxyviolacein production via multiplex  
679 SCRaMbLE iterative cycles. *Front Chem Sci Eng* **12**: 806-814.
- 680 Wang R, Gu X, Yao M, Pan C, Liu H, Xiao W, Wang Y, Yuan Y. 2017. Engineering of  $\beta$ -carotene  
681 hydroxylase and ketolase for astaxanthin overproduction in *Saccharomyces cerevisiae*.  
682 *Frontiers of Chemical Science and Engineering* **11**: 89-99.
- 683 Wu T, Ye LJ, Zhao DD, Li SW, Li QY, Zhang BL, Bi CH, Zhang XL. 2017a. Membrane engineering -  
684 A novel strategy to enhance the production and accumulation of beta-carotene in  
685 *Escherichia coli*. *Metab Eng* **43**: 85-91.
- 686 Wu X-L, Li B-Z, Zhang W-Z, Song K, Qi H, Dai J-b, Yuan Y-J. 2017b. Genome-wide landscape of  
687 position effects on heterogeneous gene expression in *Saccharomyces cerevisiae*.  
688 *Biotechnology for Biofuels* **10**.
- 689 Wu Y, Li BZ, Zhao M, Mitchell LA, Xie ZX, Lin QH, Wang X, Xiao WH, Wang Y, Zhou X et al.



690           2017c. Bug mapping and fitness testing of chemically synthesized chromosome X.  
691           *Science* **355**: 7.

692   Wu Y, Zhu R-Y, Mitchell LA, Ma L, Liu R, Zhao M, Jia B, Xu H, Li Y-X, Yang Z-M et al. 2018. In  
693           vitro DNA SCRaMbLE. *Nature Communications* **9**.

694   Xie ZX, Li BZ, Mitchell LA, Wu Y, Qi X, Jin Z, Jia B, Wang X, Zeng BX, Liu HM et al. 2017. "Perfect"  
695           designer chromosome V and behavior of a ring derivative. *Science* **355**: 8.

696   Yue JX, Li J, Aigrain L, Hallin J, Persson K, Oliver K, Bergstrom A, Coupland P, Warringer J,  
697           Lagomarsino MC et al. 2017. Contrasting evolutionary genome dynamics between  
698           domesticated and wild yeasts. *Nature Genetics* **49**: 913-+.

699   Zhou PP, Ye LD, Xie WP, Lv XM, Yu HW. 2015. Highly efficient biosynthesis of astaxanthin in  
700           *Saccharomyces cerevisiae* by integration and tuning of algal crtZ and bkt. *Appl*  
701           *Microbiol Biotechnol* **99**: 8419-8428.

702

703

704 **Table 1 *S. cerevisiae* strains used in this study**

| <b>Strains</b> | <b>Description</b>                                             | <b>Sources</b>          |
|----------------|----------------------------------------------------------------|-------------------------|
| BY4741         | <i>MATa, HIS3Δ1, LEU2Δ0, MET15Δ0, URA3Δ0</i>                   | (Brachmann et al. 1998) |
| SYNVX          | <i>MATa, HIS3Δ1, LEU2Δ0, MET15Δ0, URA3Δ0</i>                   | This study              |
| YJJ001         | <i>yXZX573, CAN1:: astaxanthin pathway</i><br>with Leu2 marker | This study              |
| YJJ002         | Introducing plasmid pGAL1-Cre-EBD-GFP-tCYC1 into strain YJJ001 | This study              |
| YJJ168         | SCRaMbLEd strain from the YJJ002                               | This study              |
| YJJ432         | SCRaMbLEd strain from the YJJ168                               | This study              |
| YJJ468         | Astaxanthin producing strain, BY4741                           | This study              |
| YJJ473         | YJJ468 with inversion (YJL052C-A-YJR071C) strain               | This study              |
| YJJ474         | YJJ468 with translocation (YJR130C and YER164W) strain         | This study              |
| YJJ522         | YJJ001 with YJL053W overexpression                             | This study              |
| YJJ523         | YJJ001 with YJL052C-A overexpression                           | This study              |
| YJJ524         | YJJ001 with YJL052W deletion                                   | This study              |
| YJJ525         | YJJ001 with YJL049W overexpression                             | This study              |
| YJJ526         | YJJ001 with YJL046W overexpression                             | This study              |
| YJJ527         | YJJ001 with YJL045W overexpression                             | This study              |
| YJJ528         | YJJ001 with YJR067C overexpression                             | This study              |
| YJJ529         | YJJ001 with YJR068W overexpression                             | This study              |
| YJJ530         | YJJ001 with YJR070C overexpression                             | This study              |
| YJJ531         | YJJ001 with YJR071W overexpression                             | This study              |
| YJJ532         | YJJ001 with YJR072C overexpression                             | This study              |
| YJJ533         | YJJ001 with YJR076C overexpression                             | This study              |
| YJJ534         | YJJ001 with YJR079W overexpression                             | This study              |
| YJJ535         | YJJ001 with YJR080C overexpression                             | This study              |
| YJJ536         | YJJ001 with YJR082C overexpression                             | This study              |
| YJJ537         | YJJ001 with YJR085C overexpression                             | This study              |
| YJJ538         | YJJ001 with YJR086W overexpression                             | This study              |
| YJJ539         | YJJ001 with YJR087W overexpression                             | This study              |
| YJJ540         | YJJ001 with YJR088C overexpression                             | This study              |
| YJJ541         | YJJ001 with YER156C overexpression                             | This study              |
| YJJ542         | YJJ001 with YER158C deletion                                   | This study              |
| YJJ543         | YJJ001 with YER163C overexpression                             | This study              |
| YJJ544         | YJJ001 with YER168C overexpression                             | This study              |
| YJJ545         | YJJ001 with YER170W overexpression                             | This study              |
| YJJ546         | YJJ001 with YJR122W overexpression                             | This study              |
| YJJ547         | YJJ001 with YJR123W overexpression                             | This study              |
| YJJ548         | YJJ001 with YJR127 deletion                                    | This study              |
| YJJ549         | YJJ001 with YJR125C overexpression                             | This study              |
| YJJ551         | YJJ001 with YJR133W overexpression                             | This study              |
| YJJ552         | YJJ001 with YJR135C overexpression                             | This study              |
| YJJ553         | YJJ001 with YJR135W-A overexpression                           | This study              |
| YJJ554         | YJJ001 with YJR136C overexpression                             | This study              |

706 **Table 2** Known gene functions for beneficial over-expression

| <b>Gene</b>    | <b>Description</b>                                                                                                                                                                                                                                                                                     |
|----------------|--------------------------------------------------------------------------------------------------------------------------------------------------------------------------------------------------------------------------------------------------------------------------------------------------------|
| YJR086W(STE18) | G protein gamma subunit; forms a dimer with Ste4p to activate the mating signaling pathway, forms a heterotrimer with Gpa1p and Ste4p to dampen signaling; C-terminus is palmitoylated and farnesylated, which are required for normal signaling                                                       |
| YJR123W(RPS5)  | Protein component of the small (40S) ribosomal subunit; least basic of non-acidic ribosomal proteins; phosphorylated in vivo; essential for viability; homologous to mammalian ribosomal protein S5 and bacterial S7                                                                                   |
| YJR135C(MCM22) | Outer kinetochore protein and component of the Ctf3 subcomplex; binds to centromeric DNA in a Ctf19p-dependent manner; involved in chromosome segregation and minichromosome maintenance; orthologous to human centromere constitutive-associated network (CCAN) subunit CENP-K and fission yeast sim4 |

707

708

709

710

711

712

713

714 **Fig. 1 SCRaMbLE with two synthetic chromosomes generating complex SVs. a,**

715 **Schematic representation of structural variations in YJJ001, YJJ168 and YJJ432.**

716 **Synthetic chromosome V and synthetic chromosome X are abbreviated as synV**

717 **and synX, respectively. b, Normalized contact maps (bin size, 2 kb) of synthetic**

718 **chromosomes in three different strains: YJJ117, YJJ168 and YJJ432. All Hi-C**

719 **reads are mapped against the reference genome of the parental strain YJJ001. c,**

720 **Three-dimensional model of the YJJ001, YJJ168 and YJJ432 genomes. Synthetic**

721 **chromosomes and wild chromosomes are indicated with graduated color and gray,**

722 **respectively. The SV area are indicated with the dashed oval. d, The astaxanthin**

723 **yield of control strain YJJ001 and SCRaMbLEd strains YJJ168 and YJJ432.**

724

725

726 **Fig. 2 Quantified interactions of loxP breakpoint-flanking regions. a, Triangle heat**

727 **maps representing the contact frequencies among 20 bin regions (length 20 kb)**

728 **upstream and downstream of two recombination sites (YJL052C-A and YJR071C)**

729 **in YJJ168, labeled A, B, C, and D. Dots show fold changes in expression in the A,**

730 **B, C, and D regions. b, Triangle heat maps representing the contact frequencies**

731 **among 20 bin regions (length 20 kb) upstream and downstream of the two**

732 **recombination sites (YER164W and YJR130C) in YJJ432, labeled E, F, G, and H.**

733 **Dots show fold changes in expression in the E, F, G, H regions.**

734

735

736 **Fig. 3 a, The astaxanthin yield of control strain YJJ001 and genes overexpression**  
737 **and deletion around pericentric inversion strain breakpoint-flanking regions and**  
738 **genes overexpression and deletion around trans-chromosomal translocation strain**  
739 **breakpoint-flanking regions. (Student's t-test; \*P < 0.05). b, Enrichment analysis**  
740 **of transcriptomics of YJJ168 and YJJ432 were used to identify differentially**  
741 **transcribed genes with known functions involved in KEGG pathways.**

742

743

744 **Fig. 4 Rational translocation and inversion of chromosomes. a, The process of**  
745 **inversion and translocation was validated in wild-type strains. Wild-type**  
746 **chromosome V and wild-type chromosome X are abbreviated as wt V and wt X,**  
747 **respectively. Validation strains exhibited inversion and translocation events**  
748 **between two LoxP sites. These events were identified by aligning all raw reads. b,**  
749 **Verification of inversion and translocation by junction PCR. c, The astaxanthin**  
750 **yield of the wild-type control strain YJJ468, inversion strain YJJ473 and**  
751 **translocation strain YJJ474. Serial dilution assay of YJJ468, YJJ473, YJJ474.**

752

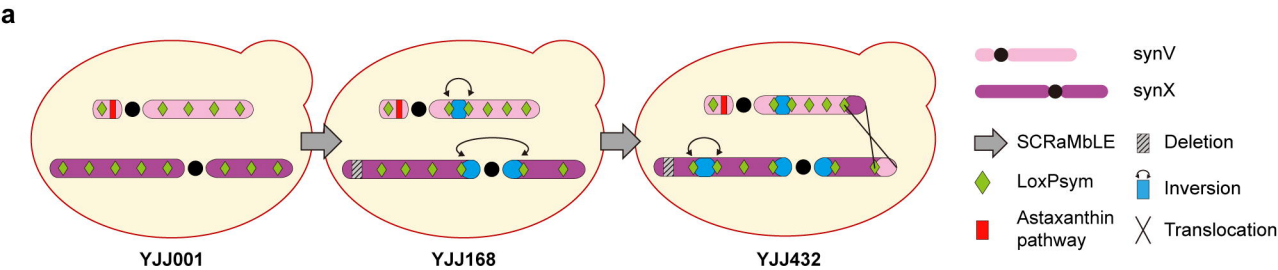

**b**

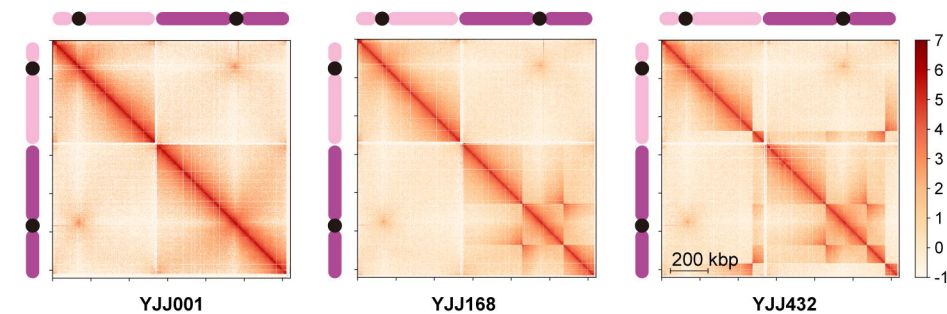

**c**

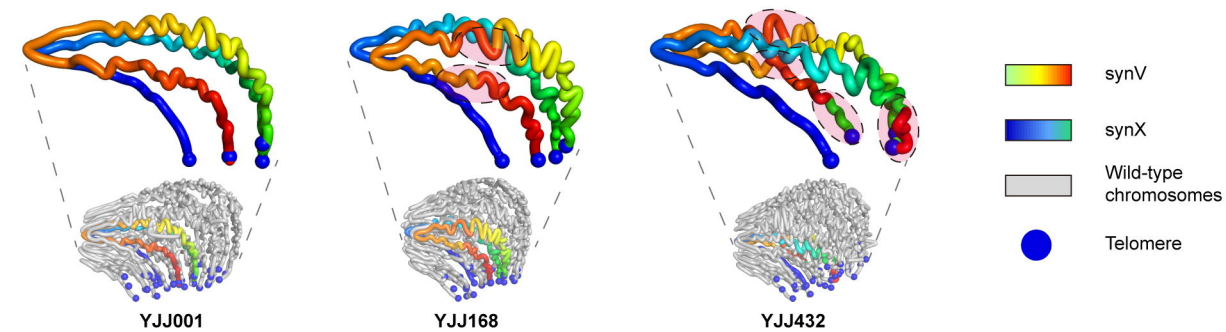

**d**

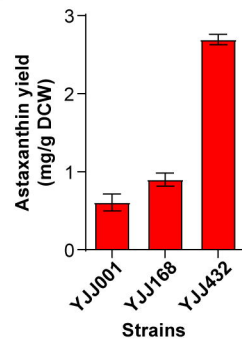



**a**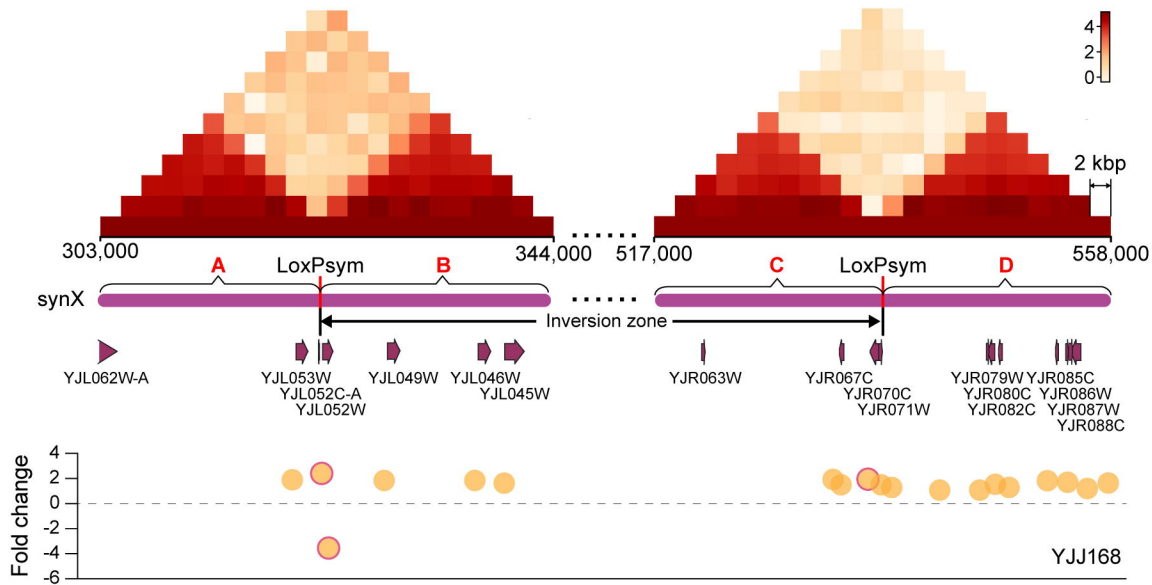**b**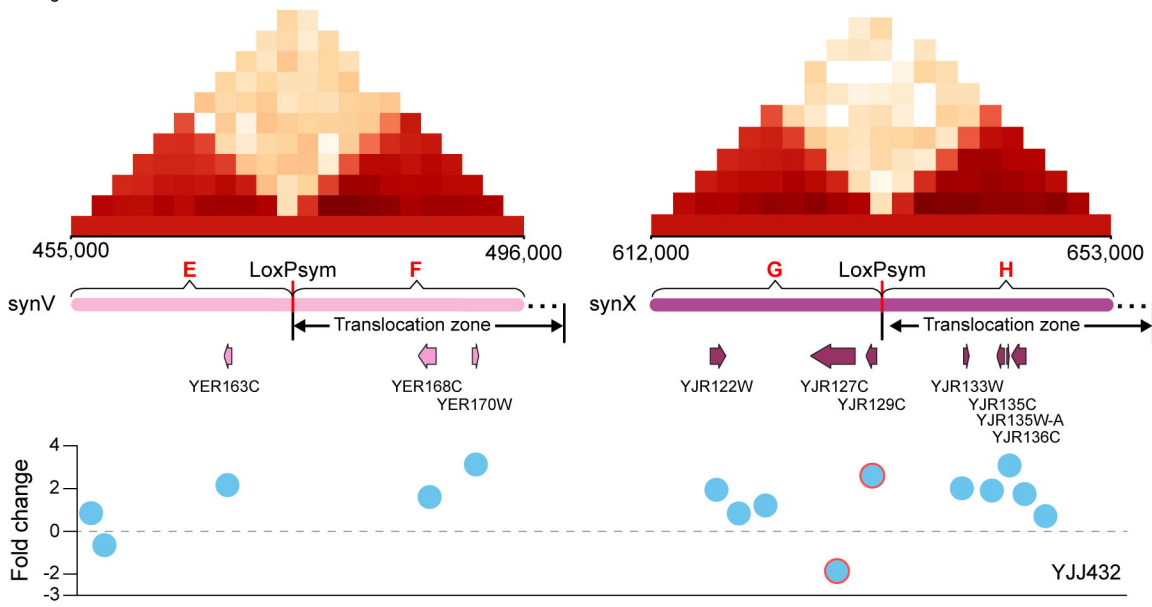

a

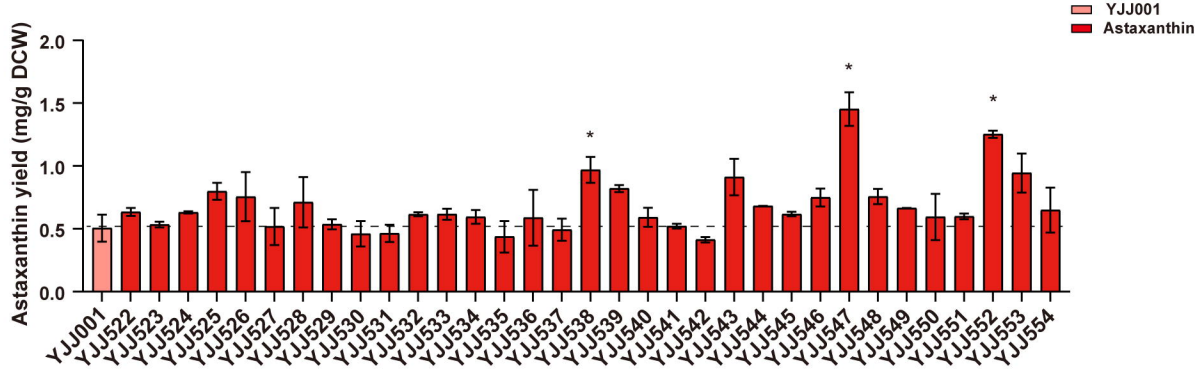

b

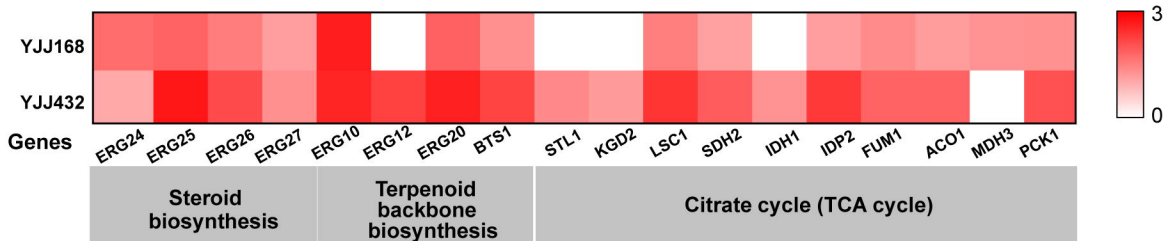

**a**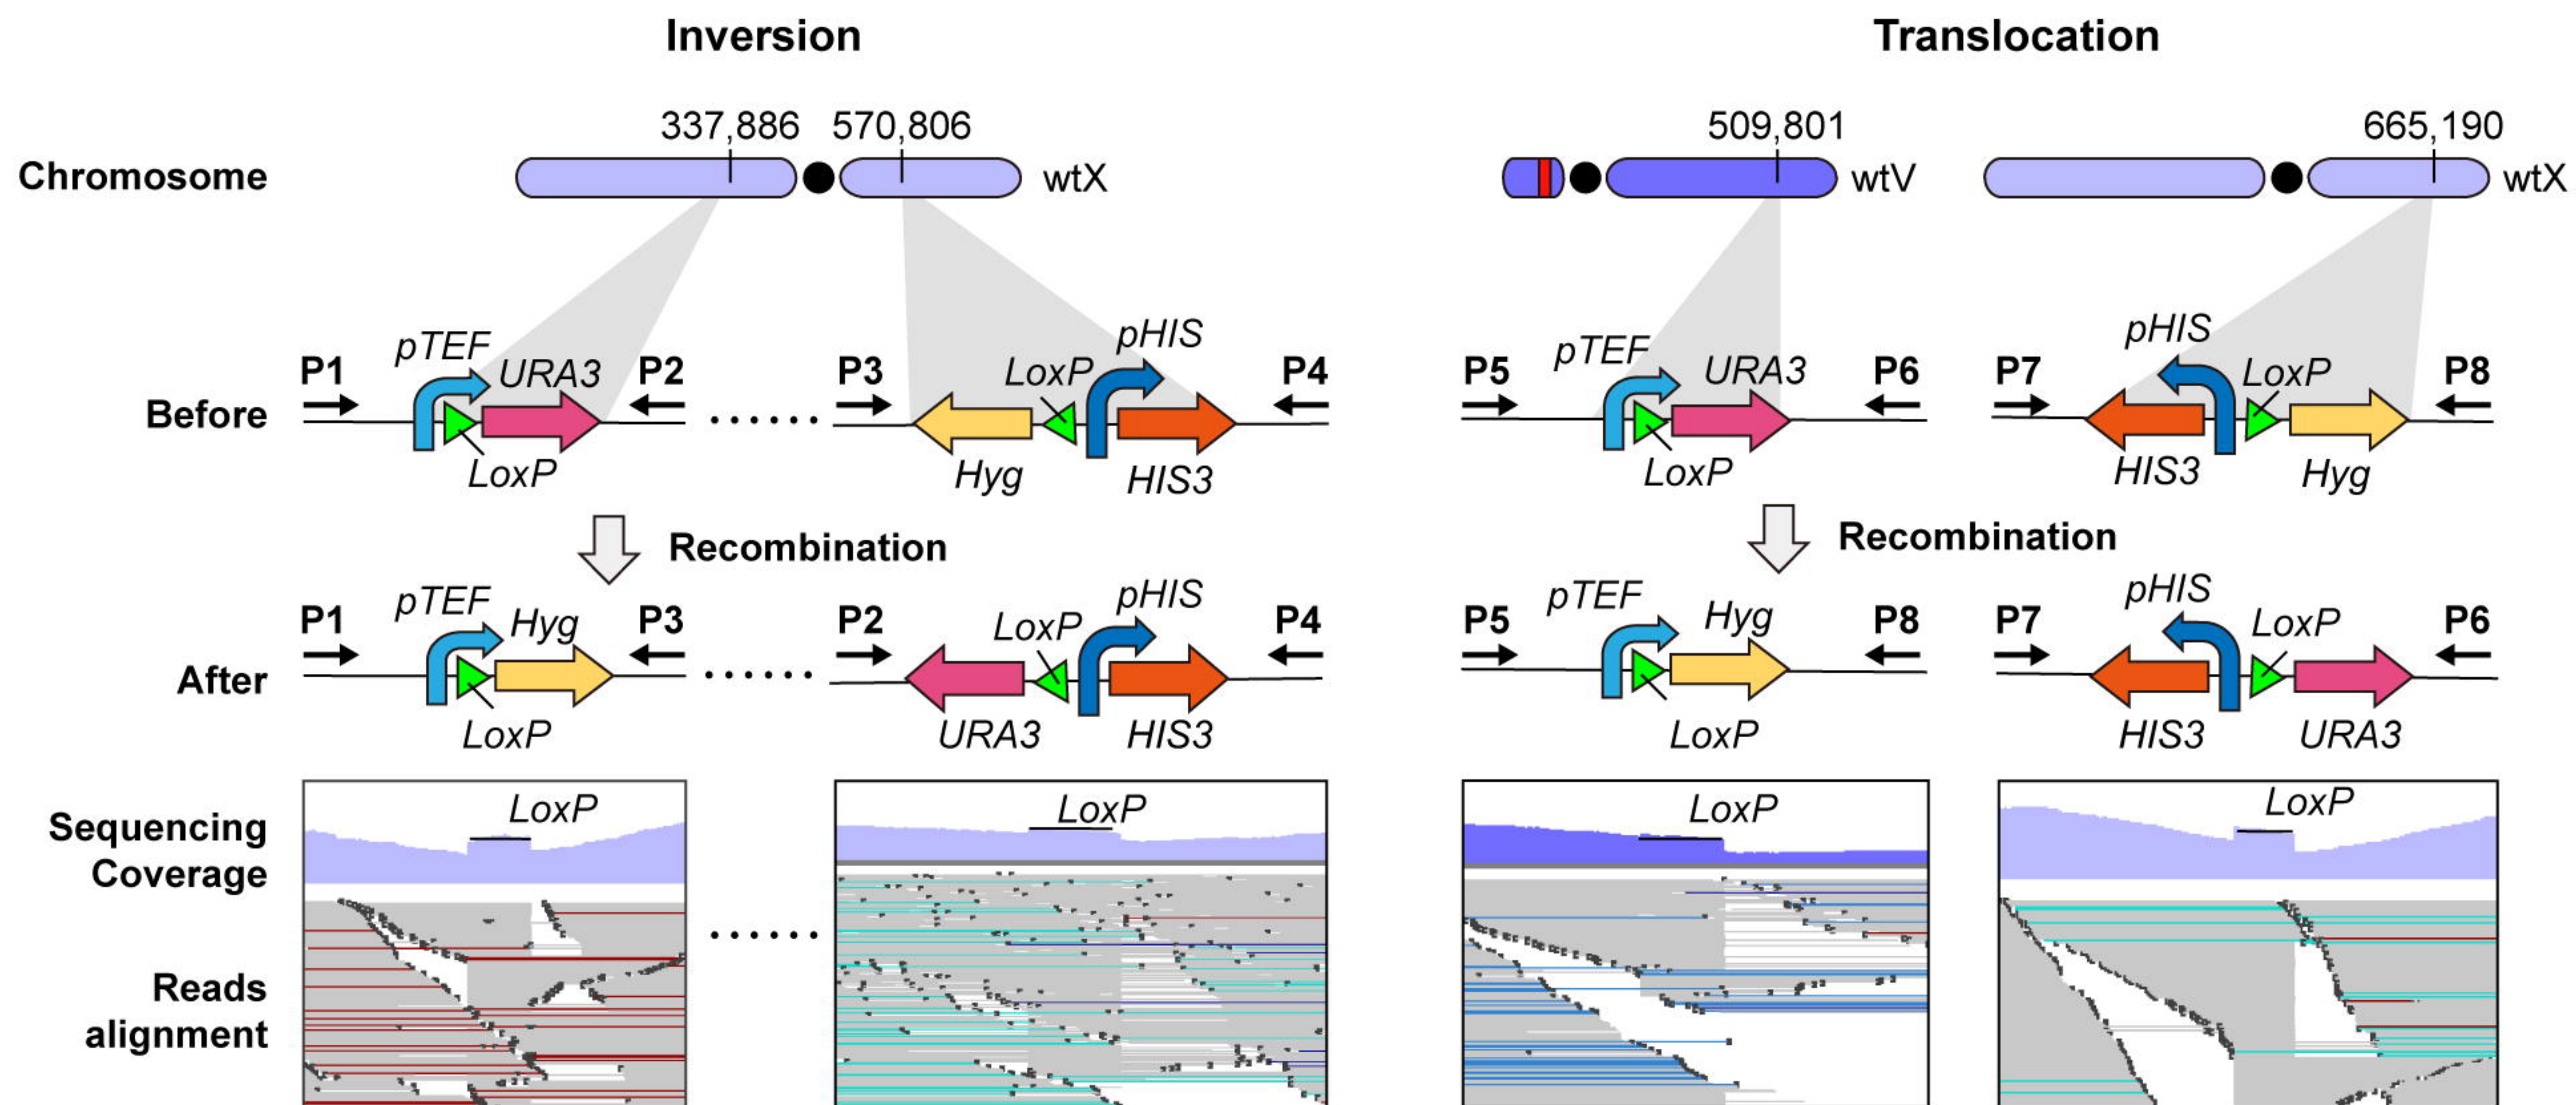**b**

bioRxiv preprint doi: <https://doi.org/10.1101/2021.07.26.453910>; this version posted August 8, 2021. The copyright holder for this preprint (which was not certified by peer review) is the author/funder. All rights reserved. No reuse allowed without permission.

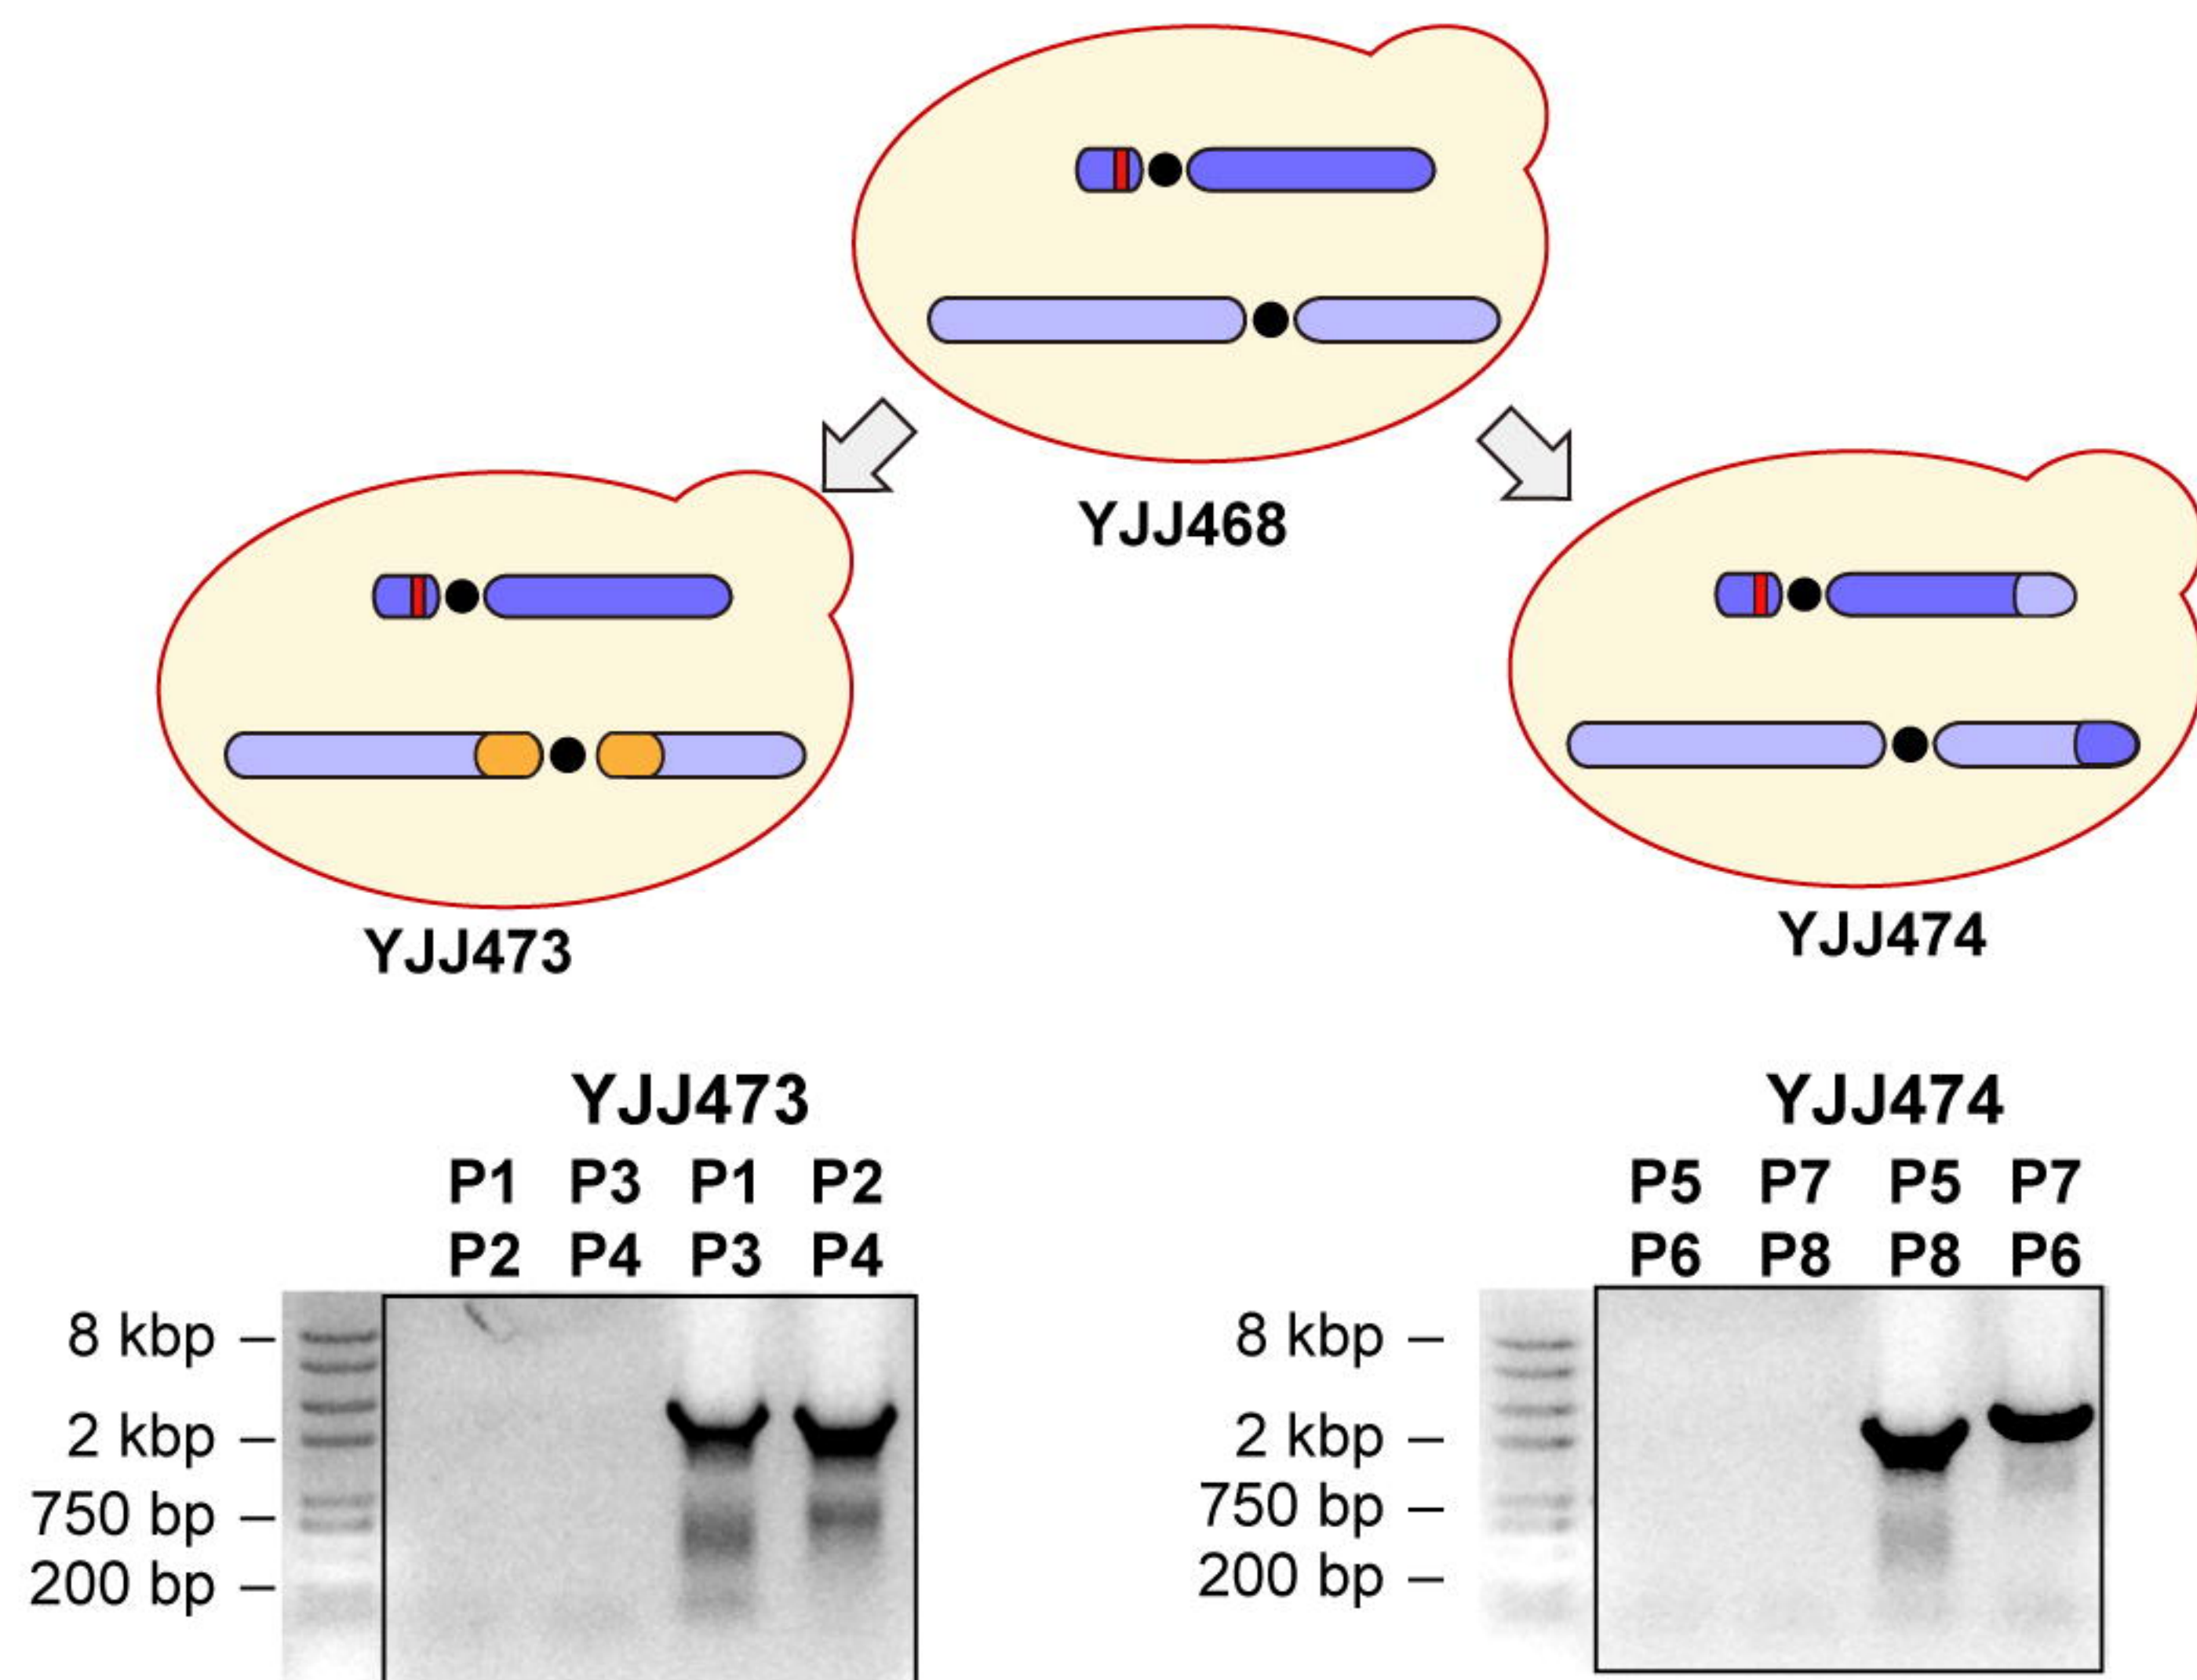**c**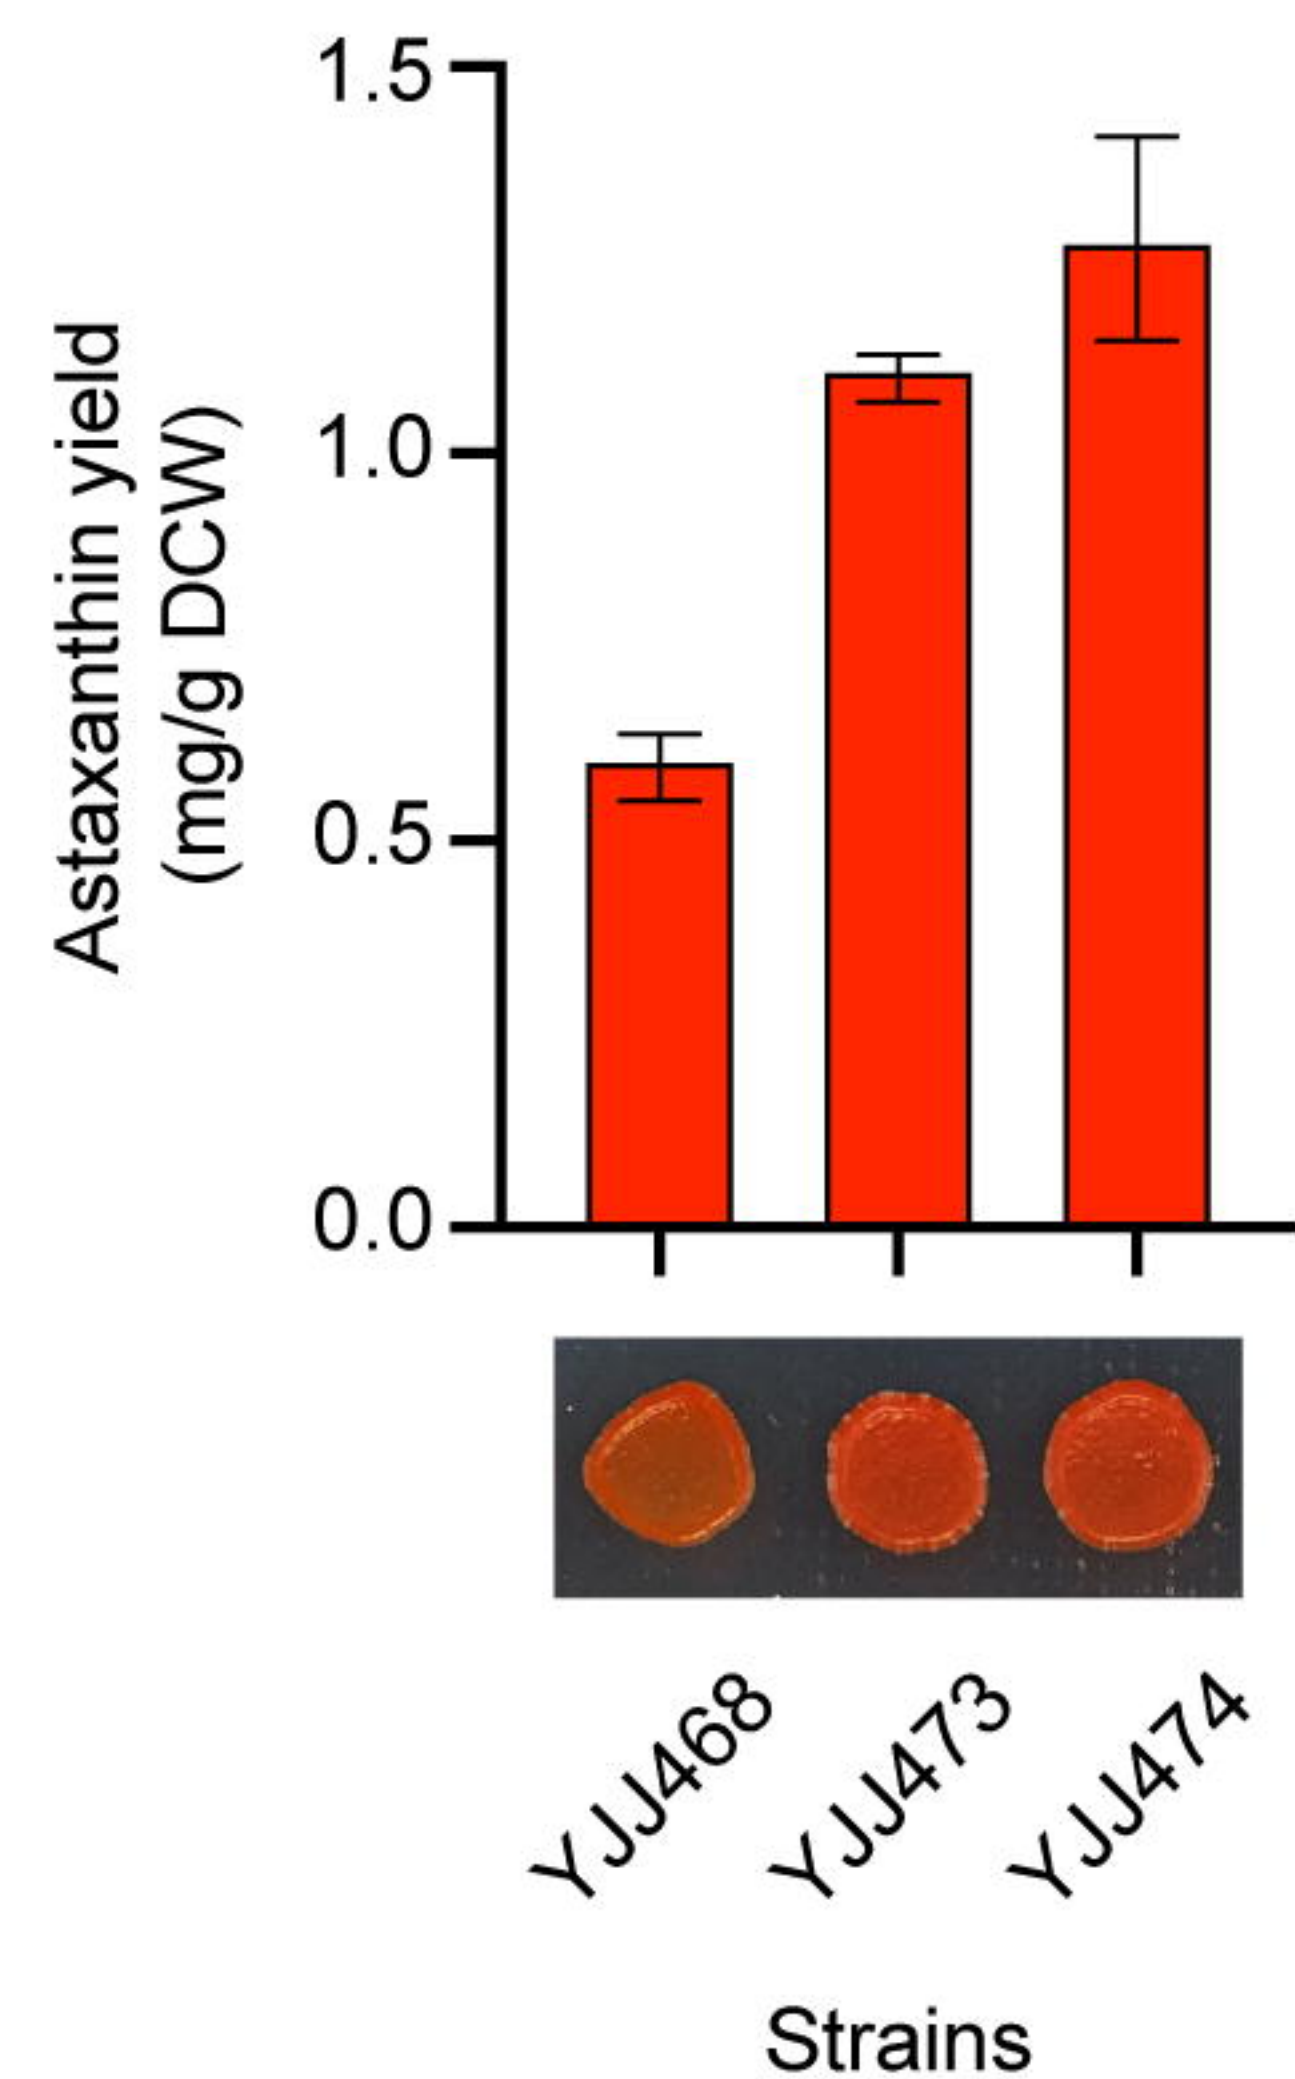

Source: https://www.biorxiv.org/content/10.1101/2021.07.26.453910v2.full.pdf
